# Supplementary material
Source: PubMed Central journal article supplement (PMC556407)
Supplement: 7600605s2.pdf [file 7600605s2.pdf]

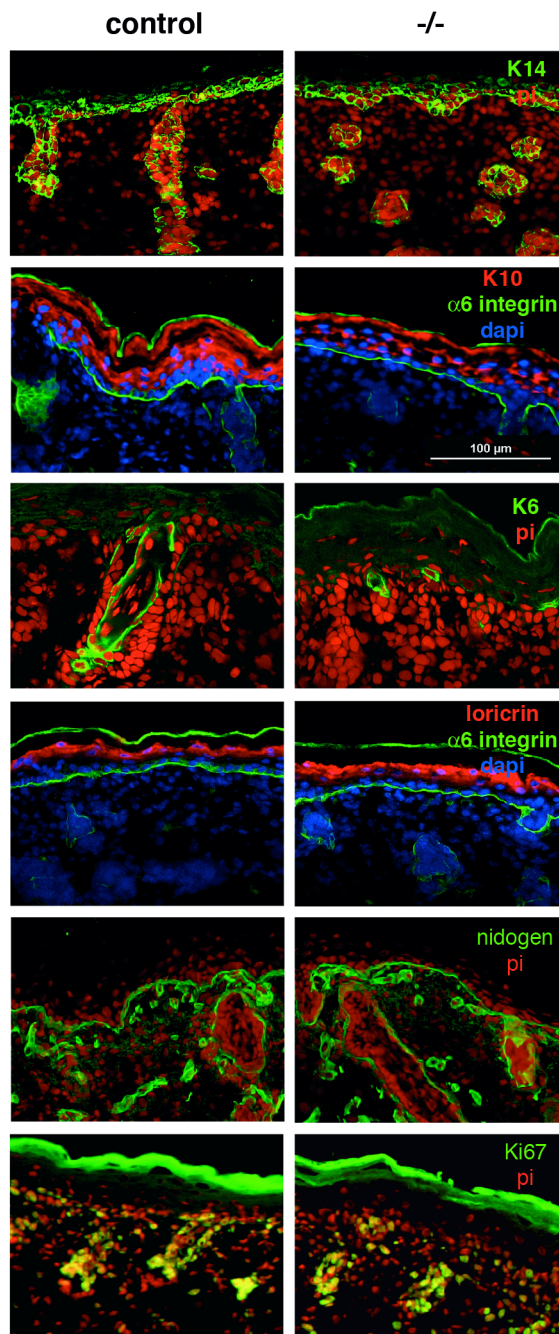

Supplementary figure 2  
Tunggal et al.

**Supplementary figure 2:** Differentiation appears normal in K14-Cre/Ecad<sup>Fl/-</sup> mice. Immunohistochemical analysis of skin sections for the indicated differentiation markers and the proliferation marker Ki 67. Nuclei were counterstained with either propidium iodide (red) or dapi (blue).
