# Supplementary material
Source: PubMed Central journal article supplement (PMC556407)
Supplement: 7600605s3.pdf [file 7600605s3.pdf]

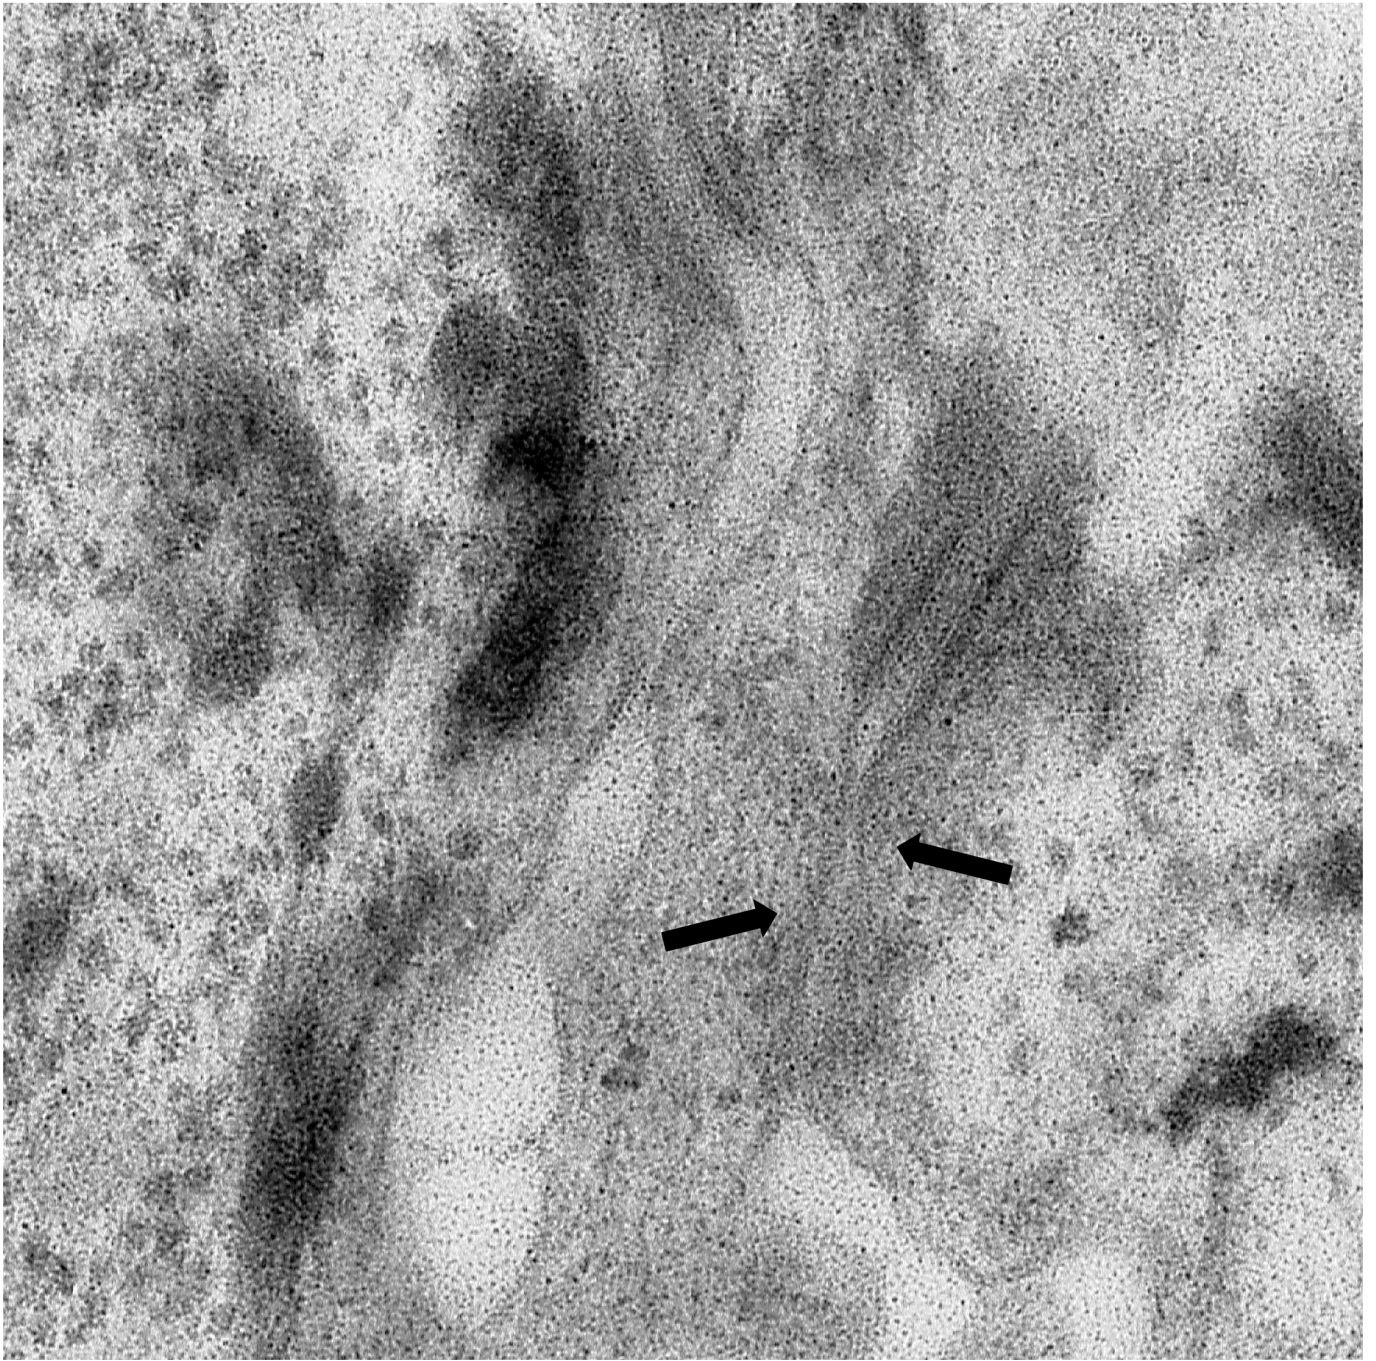

Supplementary figure 3, Tunggul et al.

**Supplementary figure 3:** Ultrastructural appearance of tight junction-like structure in K14-Cre/Ecad<sup>F1/-</sup> mice. Arrows point to tight-junction like structures.
